# Supplementary material for: Congenital Zika syndrome is associated with maternal protein malnutrition
Source: PubMed Central journal article supplement — Sci Adv. 2020 Jan 10;6(2):eaaw6284. doi: 10.1126/sciadv.aaw6284 (PMC6954064; doi:10.1126/sciadv.aaw6284), 2020-01-10
Supplement: aaw6284_SM.pdf [file aaw6284_SM.pdf]

## Supplementary Materials for

### Congenital Zika syndrome is associated with maternal protein malnutrition

J. Barbeito-Andrés, P. Pezzuto, L. M. Higa, A. A. Dias, J. M. Vasconcelos, T. M. P. Santos, J. C. C. G. Ferreira, R. O. Ferreira, F. F. Dutra, A. D. Rossi, R. V. Barbosa, C. K. N. Amorim, M. P. C. De Souza, L. Chimelli, R. S. Aguiar, P. N. Gonzalez, F. A. Lara, M. C. Castro, Z. Molnár, R. T. Lopes, M. T. Bozza, J. L. S. G. Vianez, C. G. Barbeito, P. Cuervo, M. Bellio, A. Tanuri, P. P. Garcez\*

\*Corresponding author. Email: ppgarcez@icb.ufrj.br

Published 10 January 2020, *Sci. Adv.* **6**, eaaw6284 (2020)  
DOI: 10.1126/sciadv.aaw6284

#### The PDF file includes:

- Fig. S1. Distribution of simulated  $r$  coefficients for the correlation between undernutrition and microcephaly cases in tropical states of Brazil obtained after permutation of the original dataset.
- Fig. S2. Number of ZIKV infection confirmed cases in each Brazilian state.
- Fig. S3. Viral load in E18 placentas was quantified by RT-qPCR.
- Fig. S4. Confirmation of ZIKV detection by immunohistochemistry in E15.
- Fig. S5. Viral replication in LP/ZIKV placentas at E15.
- Fig. S6. H&E staining in E15 placentas.
- Fig. S7. Viral load in E15 and E18 embryonic brains quantified by RT-qPCR.
- Fig. S8. ZIKV-infected cells colocalize with endothelial cells in E15 brains.
- Fig. S9. ZIKV-infected cells colocalize with microglial cells in E15 brains.
- Fig. S10. Staining of J2 on E15 embryonic brains colocalized with IB4.
- Fig. S11. Network describing altered genes involved in the mTOR pathway.
- Fig. S12. Morphometric analysis of brain images obtained through  $\mu$ CT.
- Fig. S13. Skull size of LP/ZIKV newborns is reduced.
- Fig. S14. Summary of the results obtained with the experimental model.
- Fig. S15. Validation of differentially expressed genes by RT-qPCR in E15 brains of Co/ZIKV and LP/ZIKV.
- Table S1. Relationship between cases of undernutrition reported in hospitals and medical services and cases of microcephaly between 2015 and 2018.
- Table S2. The estimated amount of daily protein (g) intake for each of the 83 interviewed mothers who have children with CZS.
- Table S3. Relative risk of CZS in relation to protein intake.
- Table S4. Maternal body weight (mean and SD) at the different pregnancy stages of the mouse model.

**Other Supplementary Material for this manuscript includes the following:**

(available at [advances.sciencemag.org/cgi/content/full/6/2/eaaw6284/DC1](https://advances.sciencemag.org/cgi/content/full/6/2/eaaw6284/DC1))

Table S5 (Microsoft Excel format). Differentially expressed genes between Co/ZIKV and LP/ZIKV.

## Supplementary figures

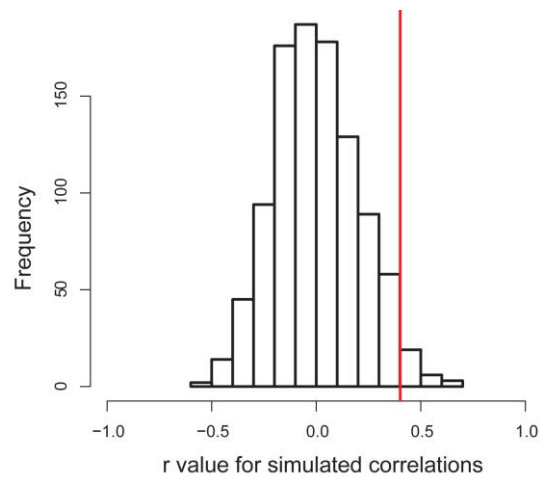

**Fig. S1. Distribution of simulated  $r$  coefficients for the correlation between undernutrition and microcephaly cases in tropical states of Brazil obtained after permutation of the original dataset.** A Monte Carlo simulation was performed by randomly correlation 1,000 times the original dataset (table S1). The resulting distribution of  $r$  coefficients has a large proportion of cases around 0, indicating no correlation, and a lower frequency of more extreme values in both tails (negative and positive) of the histogram, as expected. In red, the original  $r$  coefficient is indicated in the distribution of simulated  $r$  coefficients. The red  $r$  coefficient is in the positive extreme of the distribution and only 2.8% of simulated  $r$  coefficients are higher than the original, suggesting a p-adj value of 0.028.

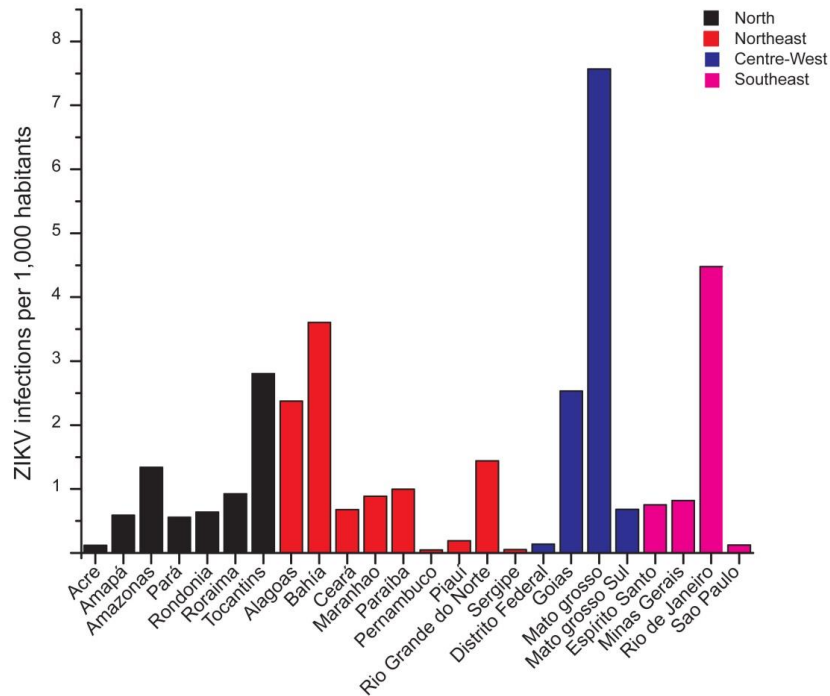

**Fig. S2. Number of ZIKV infection confirmed cases in each Brazilian state.** Total number of confirmed cases during 2016 and 2017 were summed in order to have an estimation of ZIKV prevalence in each state. Regions more affected by CZS (see Fig. 1) are not necessarily the only ones with high incidence ZIKV infections, as previously discussed in (1).

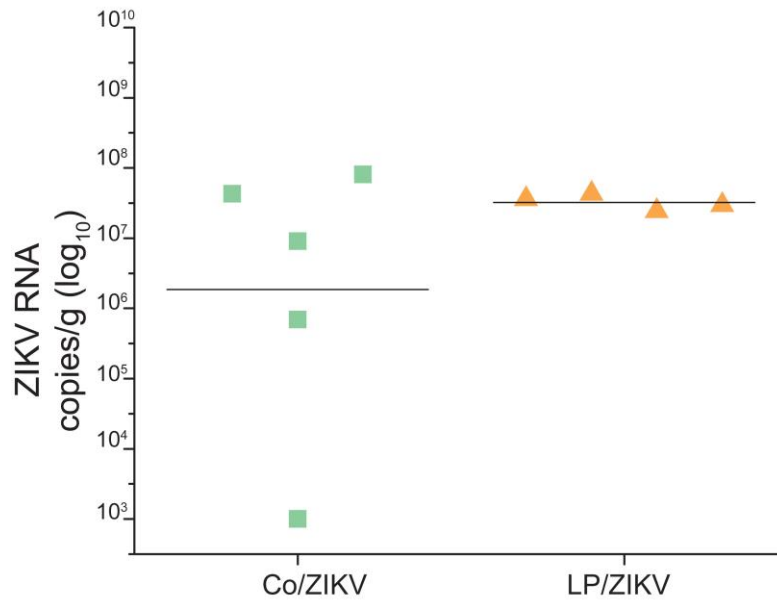

**Fig. S3. Viral load in E18 placentas was quantified by RT-qPCR.** Placentas derived from independent litters in each group (Co/ZIKV: 3 independent litter, number of samples from each litter=2, 2, 1. LP/ZIKV: 2 independent litters, number of samples from each litter= 2, 2). Lines indicate the geometric mean. U Mann-Whitney: Co/ZIKV vs LP/ZIKV:  $Z=-0.735$ ,  $p>0.05$ .

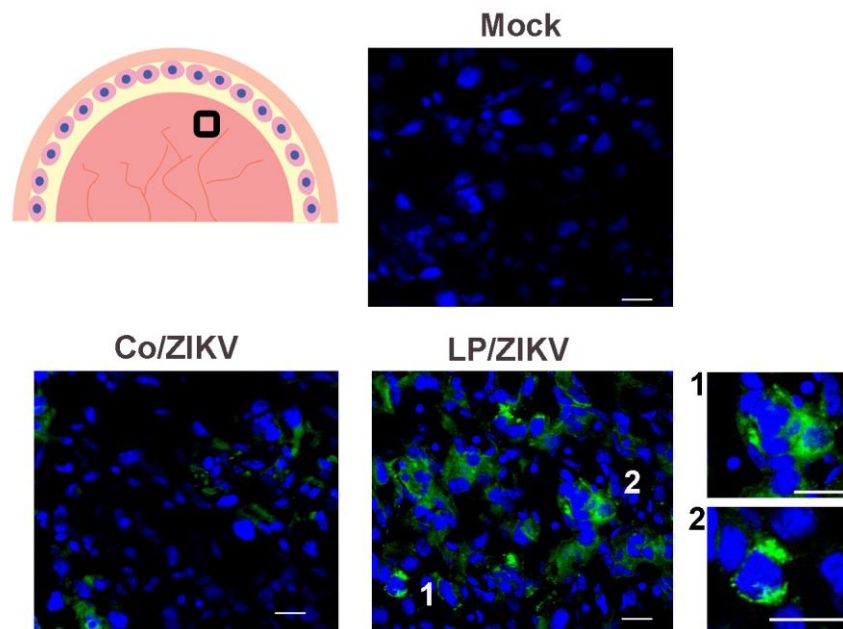

**Fig. S4. Confirmation of ZIKV detection by immunohistochemistry in E15.** Anti-NS1 antibody was used to detect ZIKV (green) counterstained with the nuclei marker DAPI (blue) in placental sections of both Co/ZIKV and LP/ZIKV. (Scale bar = 20 $\mu$ m).

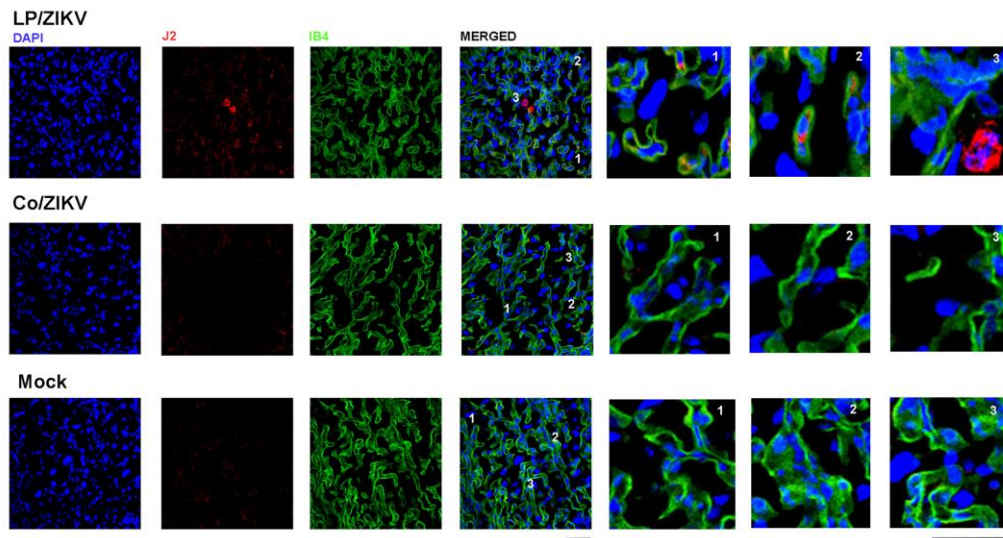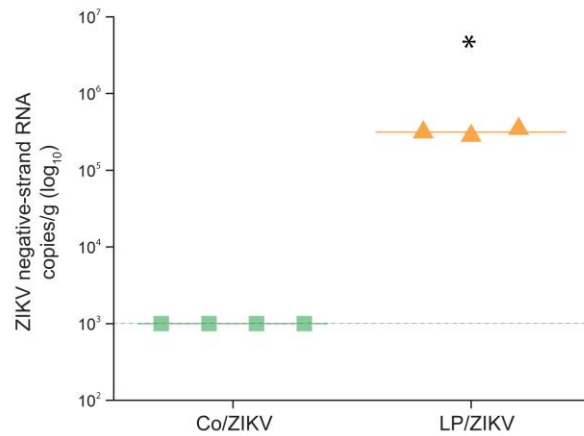

**Fig. S5. Viral replication in LP/ZIKV placentas at E15.** Top: Immunolabeling using anti-dsRNA (J2) of E15 placentas. E15 placenta sections stained with DAPI (blue), J2 (red) and IB4 (green) co-localize on the labyrinth of LP/ZIKV. (Scale bar = 50 $\mu$ m). Bottom: ZIKV negative-strand viral RNA quantification by specific RT-qPCR assay in E15 infected placentas. Placentas derived from 2 independent litters in each experimental group. U Mann-Whitney: Co/ZIKV vs LP/ZIKV:  $Z=-2.341$ ,  $*p=0.019$ .

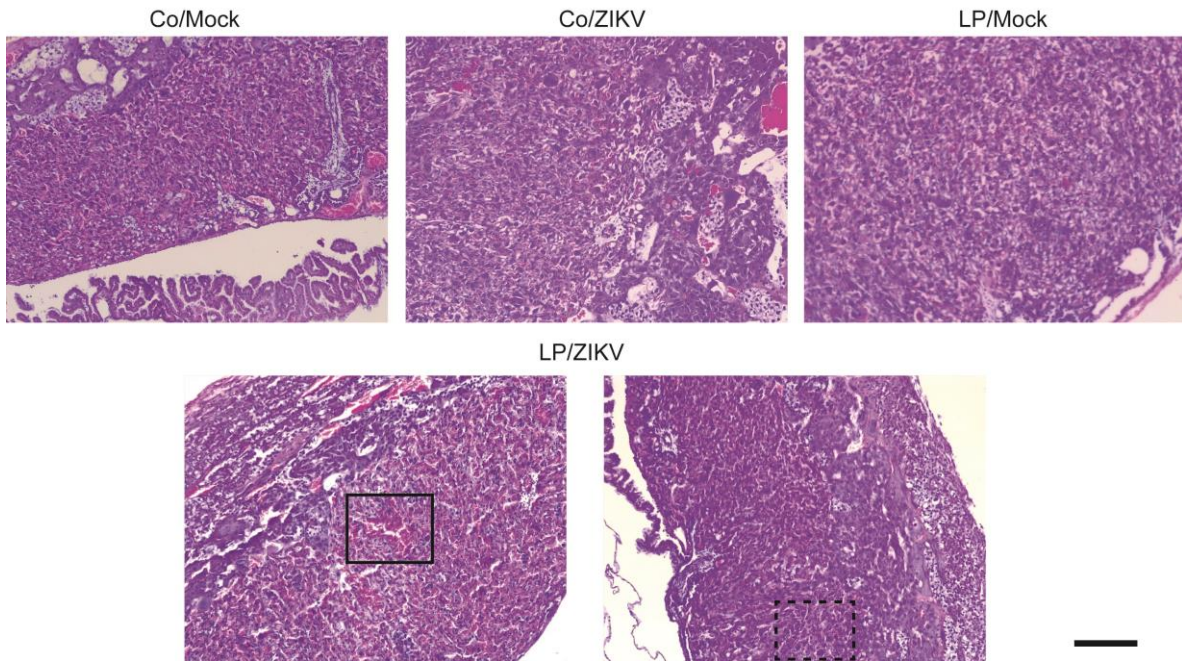

**Fig. S6. H&E staining in E15 placentas.** Low-magnification of placental sections show haemorrhage (left, black solid frame) and necrosis (right, dotted frame) areas in LP/ZIKV sections. (Scale bar = 500 $\mu$ m).



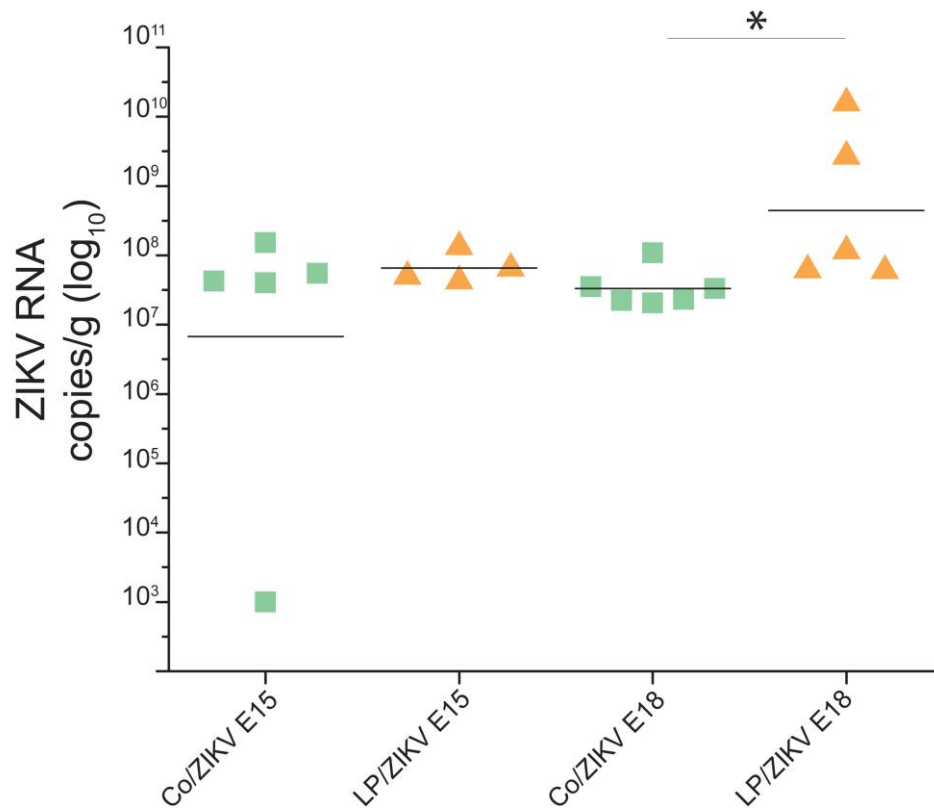

**Fig. S7. Viral load in E15 and E18 embryonic brains quantified by RT-qPCR.** Lines indicate the geometric mean. A significant difference between Co/ZIKV and LP/ZIKV was found in the E18 brains (u Mann-Whitney:-2.373\*). Brains were derived from 2 independent litters in each group for E15 brains (number of embryos: Co/ZIKV= 3, 2; LP/ZIKV=2, 2) and 3 independent litters for E18 brains (number of embryos: Co/ZIKV= 2, 2, 2; LP/ZIKV=2, 2, 1). \*p < 0.05, p>0.05.

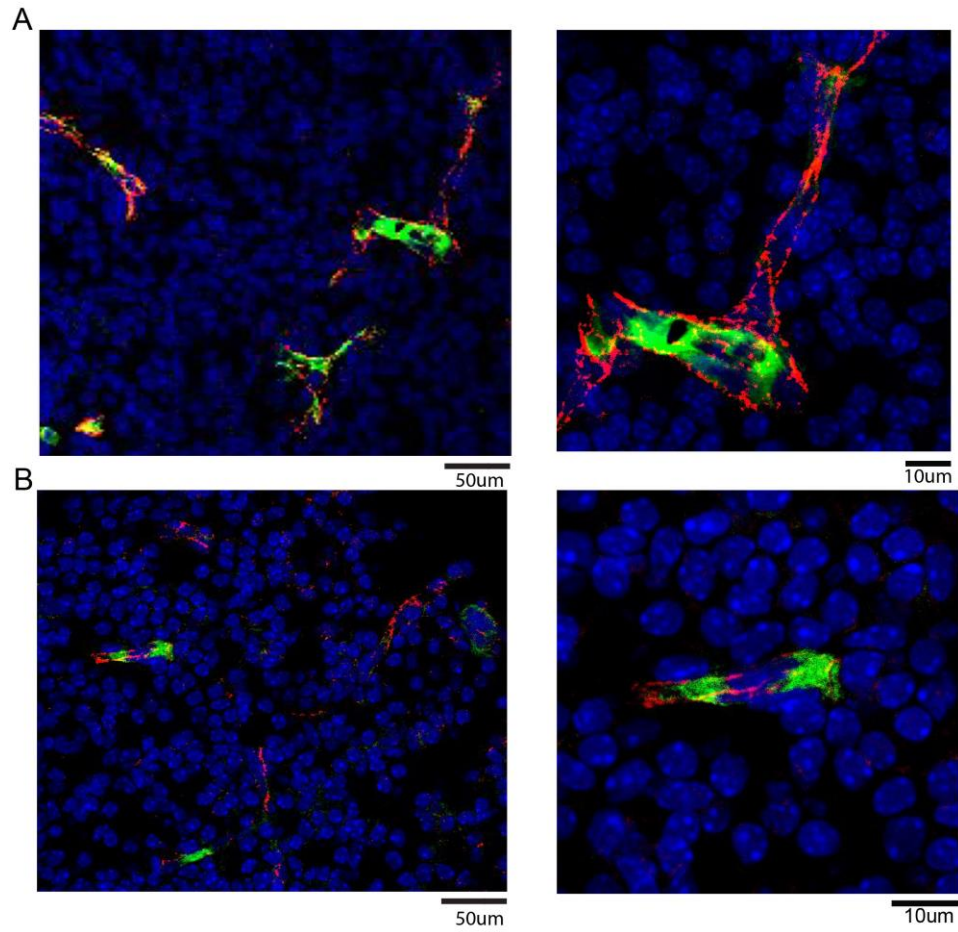

**Fig. S8. ZIKV-infected cells colocalize with endothelial cells in E15 brains.** Anti-NS1 antibody was used to detect ZIKV (green) and anti-CD31 antibody to detect endothelial cells (red) counterstained with the nuclei marker DAPI (blue) both in LP/ZIKV (A) and Co/ZIKV (B).

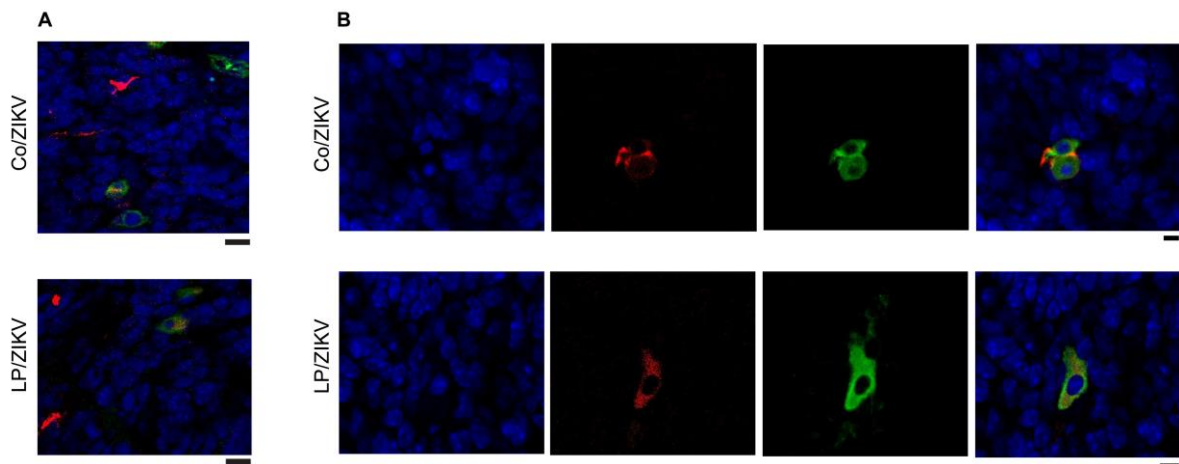

**Fig. S9. ZIKV-infected cells colocalize with microglial cells in E15 brains.** Anti-NS1 antibody was used to detect ZIKV (green) and anti-Iba1 antibody to detect microglial cells (red) counterstained with the nuclei marker DAPI (blue). In (A), lower magnitude images of E15 cerebral cortex. Both in Co/ZIKV and LP/ZIKV some Iba1+ cells are found co-localized with NS1+ (Scale bar = 10 $\mu$ m). In (B) higher magnification shows co-localization of NS1+ and Iba1+ cells (Scale bar = 5 $\mu$ m).

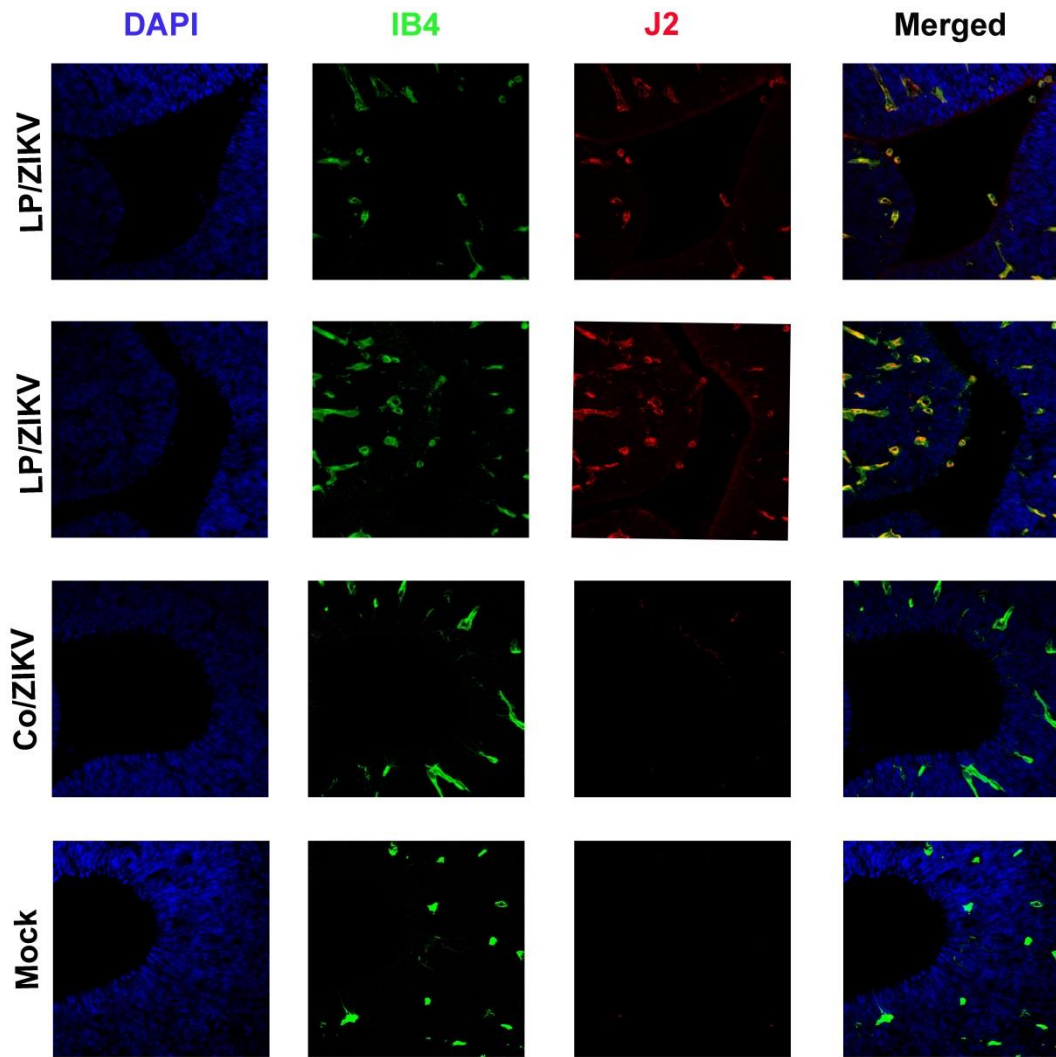

**Fig. S10. Staining of J2 on E15 embryonic brains colocalized with IB4.** J2 antibody is used to mark dsRNA and detect the localization of ZIKV in brain tissue. Since dsRNA is an intermediate structure of viral genome replication, its localization here indicates the presence of ZIKV in the tissue. In the same sections, IB4 is used to mark vessels as well as macrophage and microglia. Double-labelled IB4/J2 positive cells are found in the infected ventricular zone of LP/ZIKV in contrast to other experimental groups. (Scale bar = 50µm).

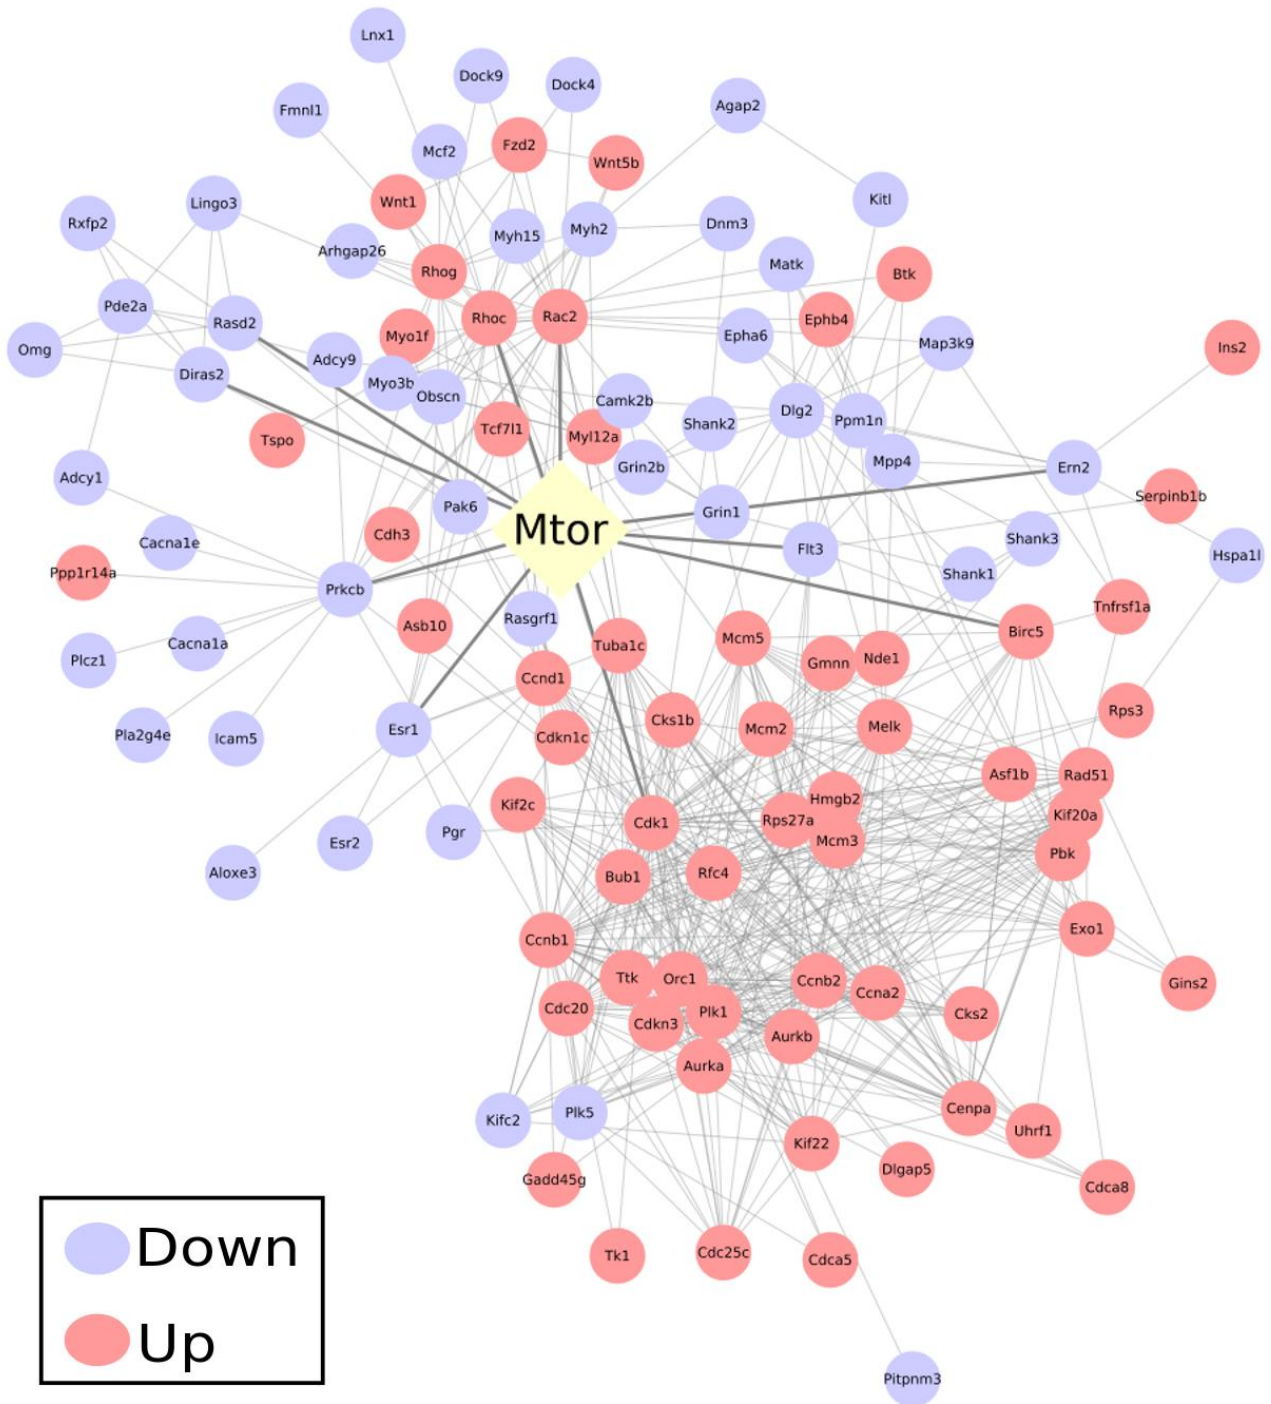

**Fig. S11. Network describing altered genes involved in the mTOR pathway.** *Mtor* (in yellow) is in the center of the network, while genes in red are upregulated and those in blue are downregulated in LP/ZIKV in comparison to Co/ZIKV.

A

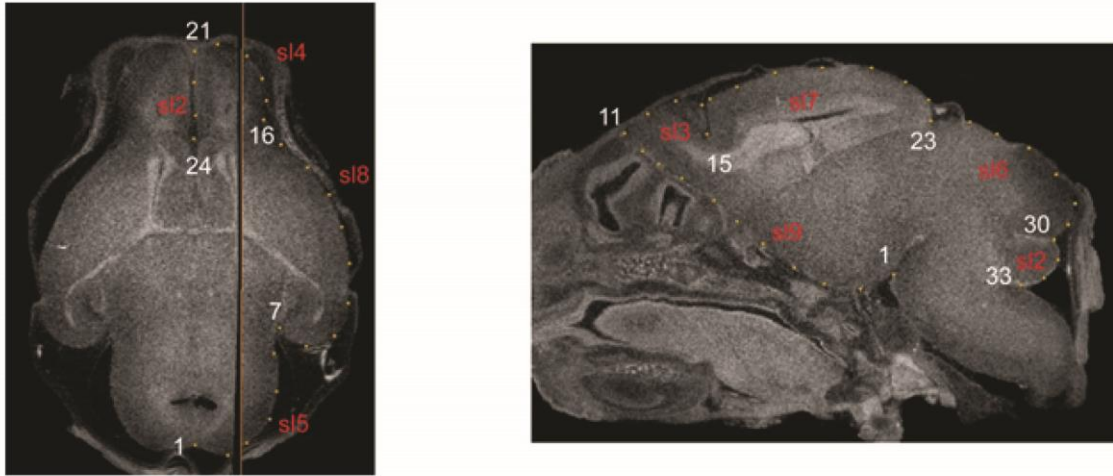

B

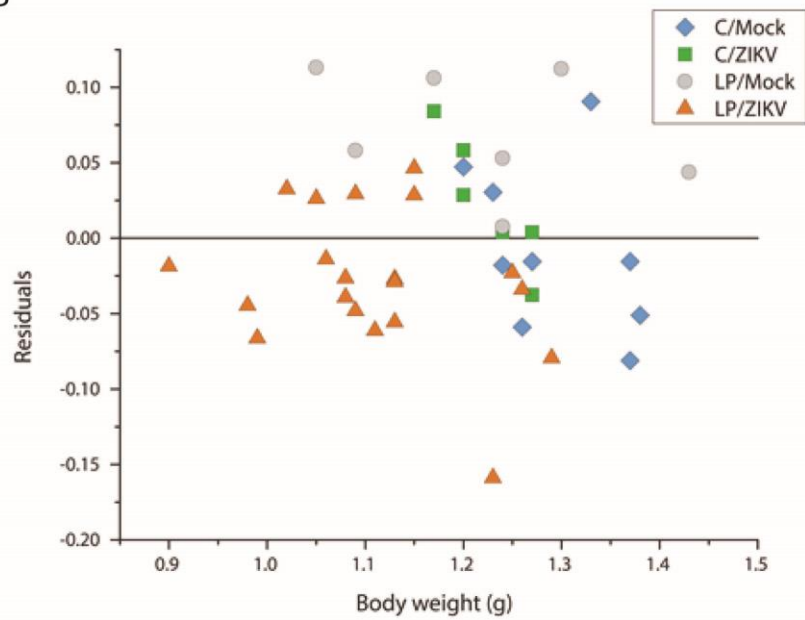

**Fig. S12. Morphometric analysis of brain images obtained through  $\mu$ CT. (A)** Landmarks and semilandmarks digitized on brain images. **(B)** Relationship between brain size and body weight. Residuals derive from a linear regression between brain size and body weight.

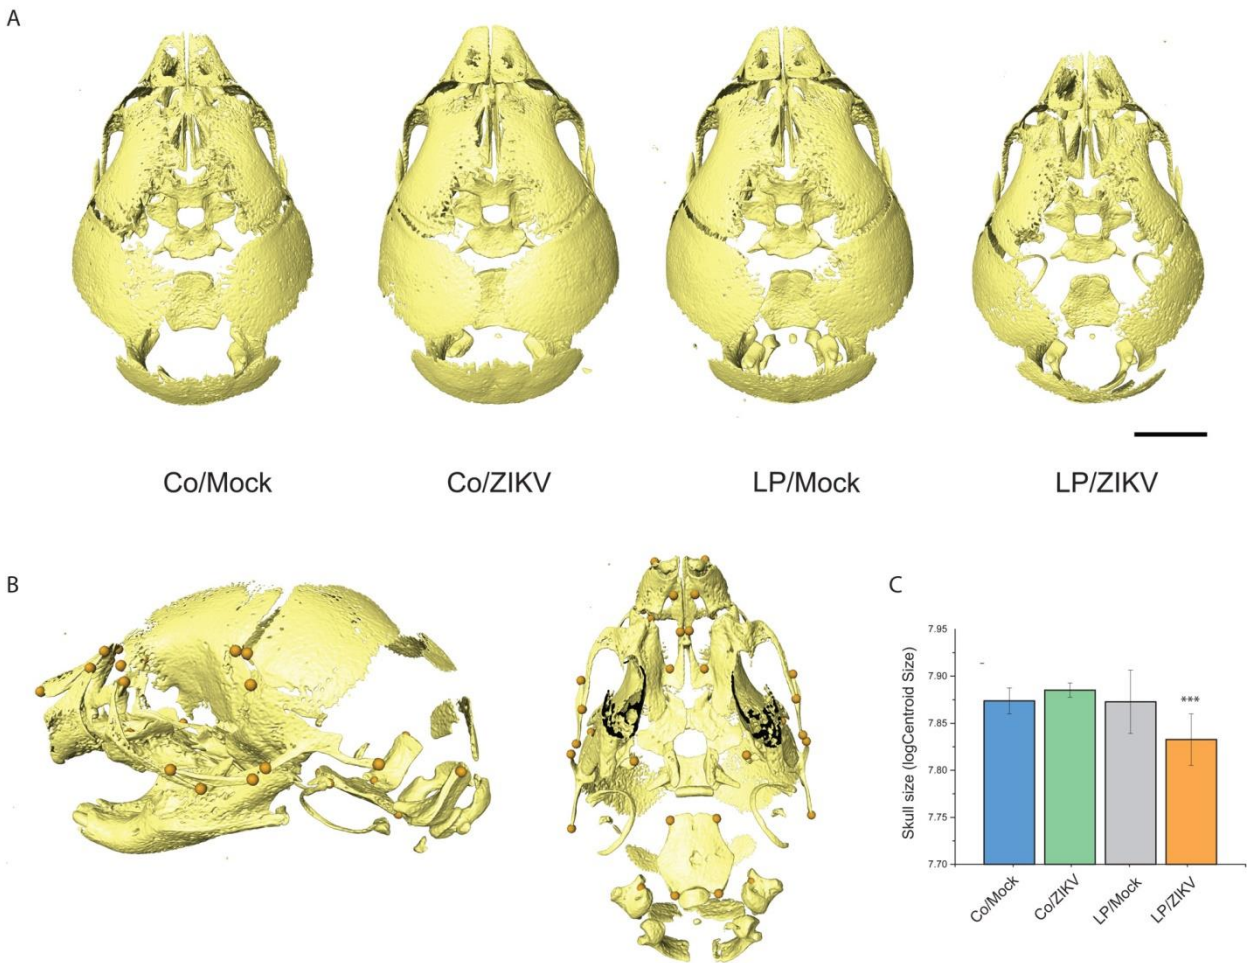

**Fig. S13. Skull size of LP/ZIKV newborns is reduced.** Skull reconstructions were obtained from  $\mu$ CT images. (A) A set of 42 bilateral landmarks were digitized in each specimen skull and their three-dimensional positions were registered. (B) Size differences are evident from representative skulls of each group (Scale bar = 2 mm). (C) Raw coordinates of landmarks were subjected to generalized Procrustes analysis and the centroid size, a comprehensive measure of scale for each skull, was obtained. Centroid size of the skull is highly significant affected in LP/ZIKV (\*\* $p < 0.001$ ).

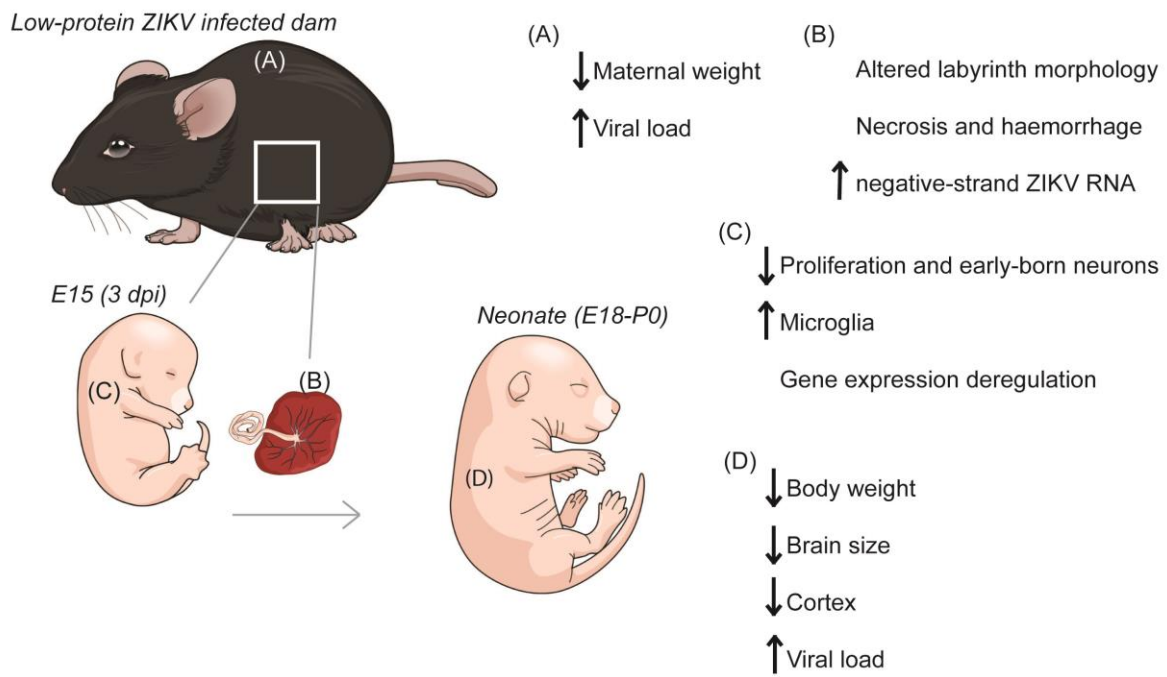

**Fig. S14. Summary of the results obtained with the experimental model.** Arrows indicate patterns in the LP/ZIKV group in comparison to the Co/ZIKV group.



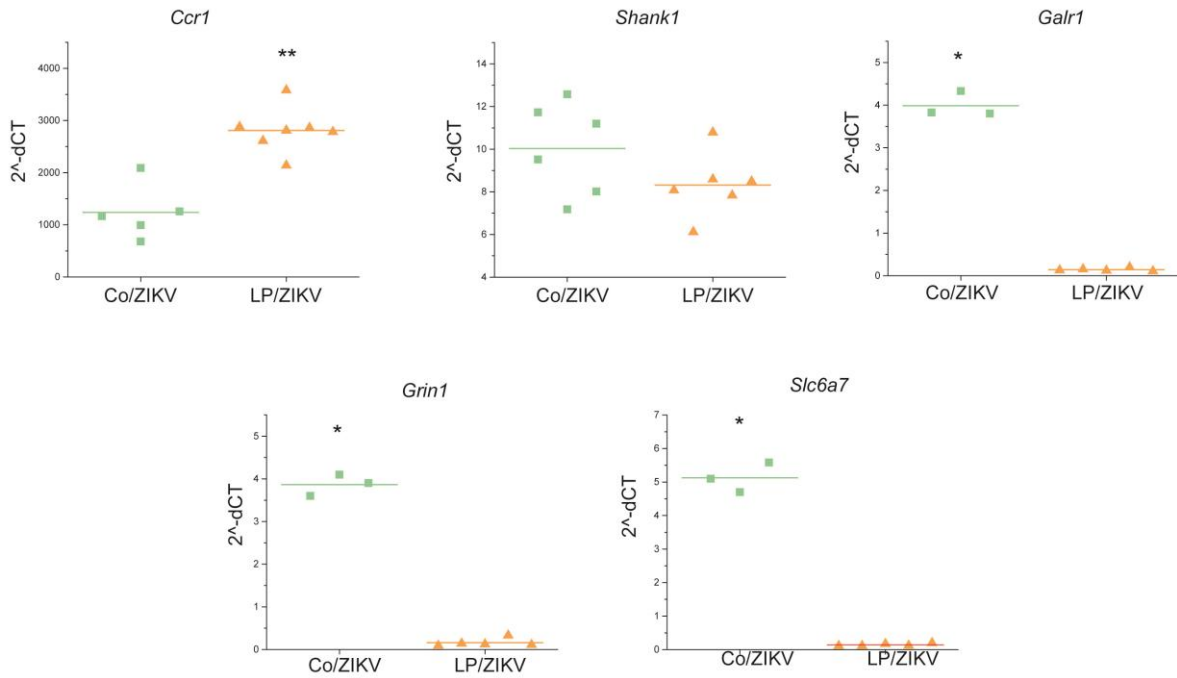

**Fig. S15. Validation of differentially expressed genes by RT-qPCR in E15 brains of Co/ZIKV and LP/ZIKV.** Selected genes included in Fig. 4C-D were validated (*Ccr1* and *Galr1*). Genes involved in mTOR pathway (fig. S11) were also validated (*Grin1* and *Galr1*). Some of the most differentially expressed genes in RNA-Seq analyses such as *Grin1* and *Slc6a7* were also validated. Relative quantity is expressed in  $2^{-\Delta\text{dCT}}$ . Using u Mann-Whitney test significant differences were found for: *Ccr1* (-2.373,  $p=0.004$ ), *Galr1* (-2.236,  $*p=0.025$ ), *Grin1* (-2.236,  $*p=0.025$ ) and *Slc6a7* (-2.249,  $*p=0.024$ ).

## Supplementary tables

**Table S1. Relationship between cases of undernutrition reported in hospitals and medical services and cases of microcephaly between 2015 and 2018.** Values are standardized by 1,000 inhabitants per state.

| <b>State</b>        | <b>Undernutrition cases between 2009 and 2018 per 1,000 hab.</b> | <b>Microcephaly cases confirmed and under investigation between 2015 and 2018 per 1,000 hab.</b> |
|---------------------|------------------------------------------------------------------|--------------------------------------------------------------------------------------------------|
| Acre                | 0.95271166                                                       | 0.030473942                                                                                      |
| Alagoas             | 3.489278731                                                      | 0.042450412                                                                                      |
| Amapá               | 0.39849575                                                       | 0.027235321                                                                                      |
| Amazonas            | 0.729358194                                                      | 0.020076602                                                                                      |
| Bahía               | 3.675983536                                                      | 0.073734764                                                                                      |
| Ceará               | 0.900894783                                                      | 0.029953673                                                                                      |
| Distrito Federal    | 0.645540881                                                      | 0.0192798                                                                                        |
| Espírito Santo      | 2.418605366                                                      | 0.049788959                                                                                      |
| Goiás               | 1.318239811                                                      | 0.024540724                                                                                      |
| Maranhao            | 1.173866957                                                      | 0.02794046                                                                                       |
| Mato grosso         | 1.544062848                                                      | 0.072617844                                                                                      |
| Mato grosso Sul     | 1.918164601                                                      | 0.012581075                                                                                      |
| Minas Gerais        | 2.866514839                                                      | 0.019386264                                                                                      |
| Pará                | 2.066276674                                                      | 0.014815681                                                                                      |
| Paraíba             | 5.137965014                                                      | 0.099989743                                                                                      |
| Pernambuco          | 1.972799155                                                      | 0.075986658                                                                                      |
| Piauí               | 1.679465757                                                      | 0.042477793                                                                                      |
| Rio de Janeiro      | 2.37756639                                                       | 0.036759859                                                                                      |
| Rio Grande do Norte | 1.567247701                                                      | 0.080075337                                                                                      |
| Rondonia            | 1.625059007                                                      | 0.044085491                                                                                      |
| Roraima             | 1.106180053                                                      | 0.050280912                                                                                      |
| Sao Paulo           | 1.058625878                                                      | 0.008085313                                                                                      |
| Sergipe             | 1.305927316                                                      | 0.073266158                                                                                      |
| Tocantins           | 1.511084576                                                      | 0.119664659                                                                                      |

**Table S2. The estimated amount of daily protein (g) intake for each of the 83 interviewed mothers who have children with CZS.**

| <b>Municipality</b> | <b>Amount of protein (g)<br/>consumed per day</b> |
|---------------------|---------------------------------------------------|
| Fortaleza           | 67.82143                                          |
| Fortaleza           | 51.29286                                          |
| Fortaleza           | 65.40714                                          |
| Fortaleza           | 63.75714                                          |
| Fortaleza           | 57.37143                                          |
| Fotaleza            | 52.99286                                          |
| Fortaleza           | 64.16429                                          |
| Fortaleza           | 67.32857                                          |
| Fortaleza           | 60.75714                                          |
| Fortaleza           | 58.83571                                          |
| Fortaleza           | 66.07857                                          |
| Fortaleza           | 74.7                                              |
| Fortaleza           | 77.7                                              |
| Fortaleza           | 53.76429                                          |
| Fortaleza           | 74.78571                                          |
| Fortaleza           | 82.65                                             |
| Fortaleza           | 84.13571                                          |
| Fortaleza           | 68.25                                             |
| Fortaleza           | 60.53571                                          |
| Fortaleza           | 70.27143                                          |
| Fortaleza           | 57.49286                                          |
| Fortaleza           | 57.66429                                          |
| Juazeiro do Norte   | 70.27143                                          |
| Jardim              | 44.43571                                          |
| Juazeiro do Norte   | 59.15                                             |
| Juazeiro do Norte   | 68.37143                                          |
| Crateus             | 59.12143                                          |
| Juazeiro do Norte   | 54.22857                                          |
| Crateus             | 63.15                                             |
| Crato               | 50.17857                                          |
| Barbalha            | 59.12143                                          |
| Várzea Alegre       | 51.07857                                          |
| Caririaçu           | 75.82857                                          |
| Juazeiro do Norte   | 54.84286                                          |
| Juazeiro do Norte   | 73.07857                                          |
| Juazeiro do Norte   | 63.33571                                          |
| Juazeiro do Norte   | 70.97857                                          |
| Barbalha            | 68.98571                                          |
| Jamacaru            | 67.58571                                          |
| Juazeiro do Norte   | 41.6                                              |

|                   |          |
|-------------------|----------|
| Crato             | 72.82143 |
| Barbalha          | 54.46429 |
| Fortaleza         | 72       |
| Fortaleza         | 72.92143 |
| Fortaleza         | 51.01429 |
| Fortaleza         | 62.26429 |
| Irauçuba          | 70.18571 |
| Irauçuba          | 54.75    |
| Catunda           | 66.00714 |
| Sobral            | 73.61429 |
| Coreaú            | 75.73571 |
| Varjota           | 67.95714 |
| Coreaú            | 67.25    |
| Caucaia           | 63.68571 |
| Quixeré           | 81.65    |
| Limoeiro do Norte | 76.15    |
| Quixeré           | 57.01429 |
| Sobral            | 81.04286 |
| Santa Quitéria    | 52.42143 |
| Forquilha         | 66.59286 |
| Moraújo           | 78.75    |
| Sobral            | 66.22857 |
| Varjota           | 77.19286 |
| Quixadá           | 64.23571 |
| Quixeramobim      | 68.13571 |
| Senador Pompeu    | 74.56429 |
| Quixeramobim      | 62.52143 |
| Quixeramobim      | 46.35    |
| Quixadá           | 68.76429 |
| Ibaretama         | 72.90714 |
| Marco             | 59.67857 |
| Apuiarés          | 73.09286 |
| Caucaia           | 65.85    |
| Santana do Cariri | 52.39286 |
| Pacoti            | 61.93571 |
| Icó               | 53.24286 |
| Icó               | 55.96429 |
| Altaneiro         | 39.50714 |
| Capistrano        | 60.22143 |
| Icó               | 61.49286 |
| Aracoiaba         | 61.56429 |
| Ipaumirim         | 48.28571 |
| Capistrano        | 78.13571 |

**Table S3. Relative risk of CZS in relation to protein intake.** Odd ratio was calculated as follows:  $(37.35/28.43)/(62.65/71.57)$ , resulting in a value of 1.5, then CZS is more probable to occur in the protein restricted group than in the well-nourished mothers.

|                         | Under 60 g/d protein | Above 60 g/d protein |
|-------------------------|----------------------|----------------------|
| CZS interviewed mothers | 37.35%               | 62.65%               |
| Ceará population        | 28.43%               | 71.57%               |

**Table S4. Maternal body weight (mean and SD) at the different pregnancy stages of the mouse model.**

| Co/Mock |       | Co/ZIKV |       | LP/Mock |       | LP/ZIKV |       | Age |
|---------|-------|---------|-------|---------|-------|---------|-------|-----|
| Mean    | SD    | Mean    | SD    | Mean    | SD    | Mean    | SD    |     |
| 20.338  | 2.090 | 22.329  | 1.929 | 20.225  | 2.859 | 20.964  | 1.714 | E0  |
| 20.733  | 2.306 | 23.014  | 2.309 | 21.075  | 2.149 | 22.129  | 1.845 | E7  |
| 24.429  | 1.151 | 25.586  | 2.064 | 23.457  | 2.379 | 23.882  | 1.710 | E12 |
| 27.600  | 1.796 | 28.414  | 2.450 | 25.350  | 2.867 | 24.955  | 2.132 | E15 |
